# Supplementary material
Source: publisher figshare collection journal article supplement (https://aacr.figshare.com/articles/dataset/_/22478766)
Supplement: Supplementary file 1 [file 39930264]

# Safety and Immunogenicity of LY3415244, a Bispecific Antibody Against TIM-3 and PD-L1, in Patients With Advanced Solid Tumors

Supplemental Figure 1. Generation of the screening ADA signal and confirmatory inhibition by the affinity-capture elution-bridge assay format

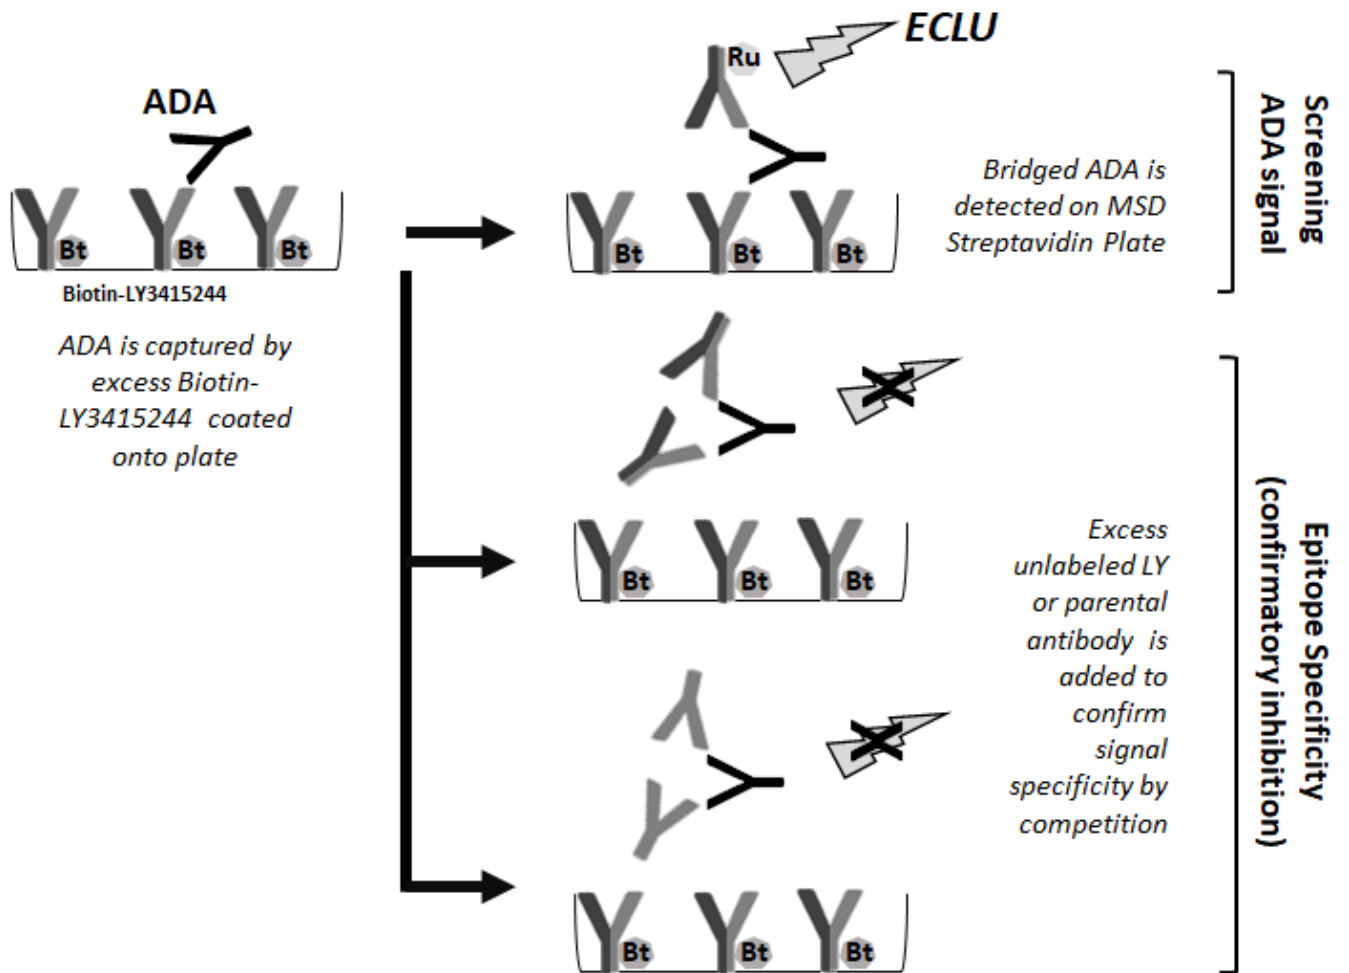

Abbreviations: ADA, anti-drug antibodies; Bt, biotin; ECLU, electrochemiluminescent units; Ru, ruthenium.

Note: Parental antibody refers to anti-TIM-3 and anti-PD-L1 monoclonal antibodies.
